# Supplementary material
Source: Springer Nature journal article supplement (https://www.springermedizin.de/resource/supplementary/13256_2012_2578_MOESM5_ESM.pdf/9649986)

07/20  
45.74  
51

CT 20  
H-SF

94.0

s 114  
s 160

16x1.5/p0.75

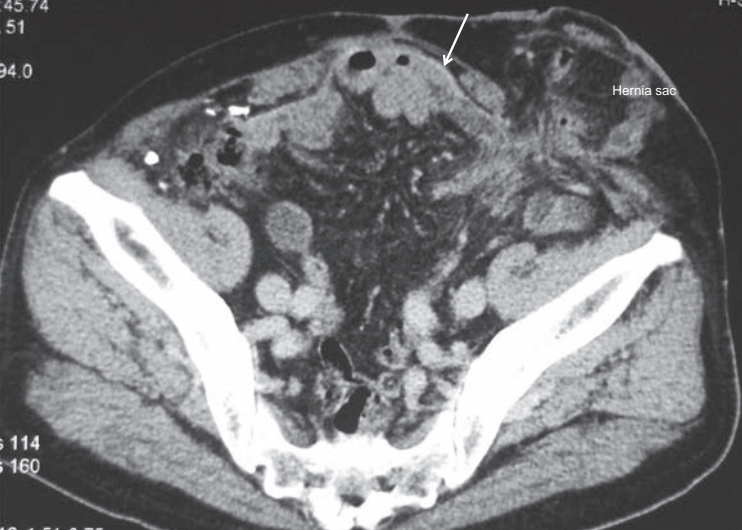

Hernia sac

Supplement: MOESM5 [file 9649986]
